# Supplementary material
Source: ML conference proceedings conference paper supplement (https://proceedings.mlr.press/v130/anagnostides21a.html)
Supplement: Supplementary file 1 [file anagnostides21a-supp.pdf]

## A Omitted Proofs

For some of our proofs we will need the following bound:

**Theorem A.1** (Hoeffding's inequality (Hoeffding (1963))). *Let  $Z_1, \dots, Z_n$  be independent random variables with  $Z_i \in [a, b]$ , for all  $i \in [n]$ . Then, for all  $\epsilon > 0$ ,*

$$\Pr \left[ \left| \frac{1}{n} \sum_{i=1}^n (Z_i - \mathbb{E}[Z_i]) \right| \geq \epsilon \right] \leq 2 \exp \left( -\frac{2n\epsilon^2}{(b-a)^2} \right). \quad (7)$$

### A.1 Proof of Lemma 3.2

*Proof.* Consider some  $t \in [0, t_0]$ , and let  $\mathcal{D}_{\mathbf{x}}$  denote the marginal distribution on the unlabeled points. By definition of the Tsybakov noise condition, the instance space  $\mathcal{X}$  may be partitioned into regions  $\mathcal{X}_{good}$  and  $\mathcal{X}_{bad}$  such that

- $\Pr_{\mathbf{x} \sim \mathcal{D}_{\mathbf{x}}}[\mathbf{x} \in \mathcal{X}_{good}] \geq 1 - At^{\frac{\alpha}{1-\alpha}}$ , and  $\eta(\mathbf{x}) \leq \frac{1}{2} - t$  almost surely for all  $\mathbf{x} \in \mathcal{X}_{good}$ . The points in  $\mathcal{X}_{good}$  should be thought of as being corrupted with Massart noise;
- $\Pr_{\mathbf{x} \sim \mathcal{D}_{\mathbf{x}}}[\mathbf{x} \in \mathcal{X}_{bad}] \leq At^{\frac{\alpha}{1-\alpha}}$ . The points in  $\mathcal{X}_{bad}$  may have flipping probabilities arbitrarily close to  $1/2$ .

As a result, it follows that

$$\int_{\mathcal{X}} (1 - 2\eta(\mathbf{x})) \mathcal{D}_{\mathbf{x}}(\mathbf{x}) d\mathbf{x} = \int_{\mathcal{X}_{good}} (1 - 2\eta(\mathbf{x})) \mathcal{D}_{\mathbf{x}}(\mathbf{x}) d\mathbf{x} + \overbrace{\int_{\mathcal{X}_{bad}} (1 - 2\eta(\mathbf{x})) \mathcal{D}_{\mathbf{x}}(\mathbf{x}) d\mathbf{x}}^{>0} \quad (8)$$

$$> 2t \int_{\mathcal{X}_{good}} \mathcal{D}_{\mathbf{x}}(\mathbf{x}) d\mathbf{x} \quad (9)$$

$$\geq 2t(1 - At^{\frac{\alpha}{1-\alpha}}), \quad (10)$$

where in the first line we used that  $\eta(\mathbf{x}) < \frac{1}{2}$  for all  $\mathbf{x} \in \mathcal{X}$ . As a result, we obtain that

$$\mathcal{M}^{-1} \geq \sup_{t \in [0, t_0]} \{2t(1 - At^{\frac{\alpha}{1-\alpha}})\}. \quad (11)$$

Finally, it is easy to verify that

$$\sup_{t \in [0, t_0]} \{2t(1 - At^{\frac{\alpha}{1-\alpha}})\} = \begin{cases} 2\alpha \left(\frac{1-\alpha}{A}\right)^{\frac{1-\alpha}{\alpha}} & \text{if } t^* \leq t_0, \\ 2t_0 \left(1 - At_0^{\frac{\alpha}{1-\alpha}}\right) & \text{if } t^* > t_0. \end{cases}$$

We should mention that when  $t^* > t_0$ , it follows that  $At_0^{\frac{\alpha}{1-\alpha}} \neq 1$ .  $\square$

### A.2 Proof of Lemma 4.1

*Proof.* First of all, we have that

$$\Pr_{\mathbf{x} \sim \mathcal{D}'_{\mathbf{x}}}[h(\mathbf{x}) \neq f(\mathbf{x})] = \frac{1}{Z} \mathbb{E}_{\mathbf{x} \sim \mathcal{D}_{\mathbf{x}}} [(1 - 2\eta(\mathbf{x})) \mathbb{1}\{h(\mathbf{x}) \neq f(\mathbf{x})\}] \quad (12)$$

$$\geq \mathbb{E}_{\mathbf{x} \sim \mathcal{D}_{\mathbf{x}}} [(1 - 2\eta(\mathbf{x})) \mathbb{1}\{h(\mathbf{x}) \neq f(\mathbf{x})\}], \quad (13)$$

where the last inequality follows from  $Z \leq 1$ . Moreover, we obtain that

$$\Pr_{(\mathbf{x}, y) \sim \mathcal{D}}[h(\mathbf{x}) \neq y] = \mathbb{E}_{\mathbf{x} \sim \mathcal{D}_{\mathbf{x}}} [(1 - \eta(\mathbf{x})) \mathbb{1}\{h(\mathbf{x}) \neq f(\mathbf{x})\}] + \mathbb{E}_{\mathbf{x} \sim \mathcal{D}_{\mathbf{x}}} [\eta(\mathbf{x}) \mathbb{1}\{h(\mathbf{x}) = f(\mathbf{x})\}] \quad (14)$$

$$= \mathbb{E}_{\mathbf{x} \sim \mathcal{D}_{\mathbf{x}}} [\eta(\mathbf{x})] + \mathbb{E}_{\mathbf{x} \sim \mathcal{D}_{\mathbf{x}}} [(1 - 2\eta(\mathbf{x})) \mathbb{1}\{h(\mathbf{x}) \neq f(\mathbf{x})\}] \quad (15)$$

$$\leq \text{OPT} + \epsilon, \quad (16)$$

where we used that  $\text{OPT} = \mathbb{E}_{\mathbf{x} \sim \mathcal{D}_{\mathbf{x}}}[\eta(\mathbf{x})]$  and  $\Pr_{\mathbf{x} \sim \mathcal{D}'_{\mathbf{x}}}[h(\mathbf{x}) \neq f(\mathbf{x})] \leq \epsilon$ .  $\square$

### A.3 Proof of Lemma 4.2

*Proof.* It follows that

$$\mathbb{E}_{(\mathbf{x}, y) \sim \mathcal{D}}[\psi(\mathbf{x}, y)] = \int_{\mathcal{X}} \phi(\mathbf{x}) f(\mathbf{x}) (1 - 2\eta(\mathbf{x})) \mathcal{D}_{\mathbf{x}}(\mathbf{x}) d\mathbf{x} \quad (17)$$

$$= Z \int_{\mathcal{X}} \phi(\mathbf{x}) f(\mathbf{x}) \mathcal{D}'_{\mathbf{x}}(\mathbf{x}) d\mathbf{x} \quad (18)$$

$$= Z \mathbb{E}_{\mathbf{x} \sim \mathcal{D}'_{\mathbf{x}}}[\phi(\mathbf{x}) f(\mathbf{x})] \quad (19)$$

$$= Z \mathbb{E}_{(\mathbf{x}, y) \sim \mathcal{D}'}[\psi(\mathbf{x}, y)]. \quad (20)$$

$\square$

### A.4 Proof of Theorem 4.3

*Proof.* First of all, given that  $\mathcal{A}$  efficiently learns up to an  $\epsilon$  error the concept class  $\mathcal{C}$ , it follows that  $q = \text{poly}(d, 1/\epsilon)$  and  $1/\tau = \text{poly}(d, 1/\epsilon)$ . For some iteration in the main loop of the algorithm,  $\tilde{Z}$  will be such that  $Z \leq \tilde{Z} \leq Z + \tau'$ . For this particular  $\tilde{Z}$ , it follows that  $|1/Z - 1/\tilde{Z}| \leq \tau'/Z^2 \leq \tau' C^2 = \tau/2$ , where we used that  $Z \geq 1/C$ .

Now consider any correlational statistical query  $\psi(\mathbf{x}, y)$ ; we have to establish that when our guess for parameter  $Z$  is close to the actual value, every query of algorithm  $\mathcal{A}$  is simulated correctly with high probability. Indeed, Lemma 4.2 implies that

$$\left| \frac{1}{\tilde{Z}} \mathbb{E}_{(\mathbf{x}, y) \sim \mathcal{D}}[\psi(\mathbf{x}, y)] - \mathbb{E}_{\mathbf{x} \sim \mathcal{D}'_{\mathbf{x}}}[\psi(\mathbf{x}, f(\mathbf{x}))] \right| = \left| \frac{1}{\tilde{Z}} - \frac{1}{Z} \right| \left| \mathbb{E}_{(\mathbf{x}, y) \sim \mathcal{D}}[\psi(\mathbf{x}, y)] \right| \leq \tau/2, \quad (21)$$

where  $\mathcal{D}'$  is defined as in Lemma 4.2. Moreover, let  $\widehat{\mathbb{E}}_{\mathcal{D}}[\psi(\mathbf{x}, y)]$  be the empirical estimate of  $\mathbb{E}_{(\mathbf{x}, y) \sim \mathcal{D}}[\psi(\mathbf{x}, y)]$  formed from  $\mathcal{O}(C^2 \log(q/\delta)/\tau^2)$  samples. Given that  $|\psi(\mathbf{x}, y)| \leq 1$ , Hoeffding's inequality implies that with probability at least  $1 - \delta/q$ ,

$$\left| \mathbb{E}_{(\mathbf{x}, y) \sim \mathcal{D}}[\psi(\mathbf{x}, y)] - \widehat{\mathbb{E}}_{\mathcal{D}}[\psi(\mathbf{x}, y)] \right| \leq \frac{\tau}{2C} \leq \frac{\tau \tilde{Z}}{2}. \quad (22)$$

As a result, combining (21) and (22) yields that with probability at least  $1 - \delta/q$ ,

$$\left| \frac{1}{\tilde{Z}} \widehat{\mathbb{E}}_{\mathcal{D}}[\psi(\mathbf{x}, y)] - \mathbb{E}_{\mathbf{x} \sim \mathcal{D}'_{\mathbf{x}}}[\psi(\mathbf{x}, f(\mathbf{x}))] \right| \leq \frac{\tau'}{Z^2} \leq \tau. \quad (23)$$

By the union bound, we obtain that for the  $\tilde{Z}$  that satisfies  $Z \leq \tilde{Z} \leq Z + \tau'$ , all of the  $q$  CSQ queries made by algorithm  $\mathcal{A}$  are answered correctly up to error  $\tau$  with probability at least  $1 - \delta$ . Then, for this particular iteration the output hypothesis  $h$  of algorithm  $\mathcal{A}$  satisfies  $\Pr_{\mathbf{x} \sim \mathcal{D}'_{\mathbf{x}}}[h(\mathbf{x}) \neq f(\mathbf{x})] \leq \epsilon$ , which – by Lemma 4.1 – implies that  $\Pr_{(\mathbf{x}, y) \sim \mathcal{D}}[h(\mathbf{x}) \neq y] \leq \text{OPT} + \epsilon$ . Finally, let  $\widehat{\Pr}_{\mathcal{D}}[h(\mathbf{x}) \neq y]$  be the empirical estimate of  $\Pr_{(\mathbf{x}, y) \sim \mathcal{D}}[h(\mathbf{x}) \neq y]$ . If we invoke  $\mathcal{O}(\log(1/\delta)/\epsilon^2)$  samples, we obtain that with probability at least  $1 - \delta$ ,

$$\left| \widehat{\Pr}_{\mathcal{D}}[h(\mathbf{x}) \neq y] - \Pr_{(\mathbf{x}, y) \sim \mathcal{D}}[h(\mathbf{x}) \neq y] \right| \leq \epsilon. \quad (24)$$

Thus, by the union bound  $\mathcal{O}(\log(N/\delta)/\epsilon^2)$  samples suffice to guarantee that the estimation error is up to  $\epsilon$  in every iteration with probability at least  $1 - \delta$ , where  $N = \mathcal{O}(C^2/\tau)$  is the number of iterations of the main loop in the algorithm. Consequently, the output of the algorithm  $h$  satisfies, with probability at least  $1 - 2\delta$ ,  $\Pr_{(\mathbf{x}, y) \sim \mathcal{D}}[h(\mathbf{x}) \neq y] \leq \text{OPT} + 3\epsilon$ . Finally, rescaling  $\epsilon$  and  $\delta$  concludes the proof.  $\square$

### A.5 Proof of Lemma 5.2

*Proof.* If  $f$  represents the target function, the claim follows from the following observation:

$$\mathbb{E}_{\mathbf{x} \sim \mathcal{D}'_{\mathbf{x}}} [\psi(\mathbf{x}, f(\mathbf{x}))] = \mathbb{E}_{\mathbf{x} \sim \mathcal{D}'_{\mathbf{x}}} \left[ \psi(\mathbf{x}, -1) \frac{1 - f(\mathbf{x})}{2} + \psi(\mathbf{x}, 1) \frac{1 + f(\mathbf{x})}{2} \right] \quad (25)$$

$$= \mathbb{E}_{\mathbf{x} \sim \mathcal{D}'_{\mathbf{x}}} \left[ \frac{\psi(\mathbf{x}, 1) - \psi(\mathbf{x}, -1)}{2} f(\mathbf{x}) \right] + \mathbb{E}_{\mathbf{x} \sim \mathcal{D}'_{\mathbf{x}}} \left[ \frac{\psi(\mathbf{x}, 1) + \psi(\mathbf{x}, -1)}{2} \right]. \quad (26)$$

$\square$

### A.6 Proof of Lemma 5.3

*Proof.* Let  $(\phi', \tau)$  represent the target independent statistical query. In the interest of simplifying our argument we notice that

$$\mathbb{E}_{\mathbf{x} \sim \mathcal{D}'_{\mathbf{x}}} [\phi'(\mathbf{x})] = \mathbb{E}_{\mathbf{x} \sim \mathcal{D}'_{\mathbf{x}}} \left[ -1 + 2 \frac{1 + \phi'(\mathbf{x})}{2} \right] = -1 + 2 \mathbb{E}_{\mathbf{x} \sim \mathcal{D}'_{\mathbf{x}}} [\phi(\mathbf{x})], \quad (27)$$

where  $\phi(\mathbf{x}) = (1 + \phi'(\mathbf{x}))/2$ . Thus, it suffices to simulate the statistical query  $(\phi, \tau/2)$  on  $\mathcal{D}'_{\mathbf{x}}$ , where  $\phi$  takes values in  $[0, 1]$ . If  $Z = \mathcal{M}^{-1} = \mathbb{E}_{\mathcal{D}_{\mathbf{x}}}[1 - 2\eta(\mathbf{x})]$ , we have that

$$\mathbb{E}_{\mathbf{x} \sim \mathcal{D}'_{\mathbf{x}}} [\phi(\mathbf{x})] = \frac{1}{Z} \int_{\mathcal{X}} \phi(\mathbf{x})(1 - 2\eta(\mathbf{x})) \mathcal{D}_{\mathbf{x}}(\mathbf{x}) d\mathbf{x} = \frac{1}{Z} \mathbb{E}_{\mathbf{x} \sim \mathcal{D}_{\mathbf{x}}} [\phi(\mathbf{x})(1 - 2\eta(\mathbf{x}))]. \quad (28)$$

Let  $\widehat{Z}$  be the empirical estimate of  $\mathbb{E}_{\mathcal{D}_{\mathbf{x}}}[1 - 2\eta(\mathbf{x})]$  formed from  $\mathcal{O}(\log(1/\delta)/(\tau')^2)$  samples of  $\text{EX}^{\eta}(f, \mathcal{D}_{\mathbf{x}}, \eta)$ , for some  $\delta > 0$  and  $\tau' := \tau/(2C)$ . Given that  $0 \leq 1 - 2\eta(\mathbf{x}) \leq 1, \forall \mathbf{x} \in \mathcal{X}$ , Hoeffding's inequality implies that  $|\widehat{Z} - Z| < \tau'/2$ , with probability at least  $1 - \delta$ . Thus, if we let  $\widehat{Z} := \widehat{Z} + \tau'/2$ , we obtain that  $Z < \widehat{Z} < Z + \tau'$ , with probability at least  $1 - \delta$ . Furthermore, let  $\widehat{\mathbb{E}}_{\mathcal{D}_{\mathbf{x}}}[\phi(\mathbf{x})(1 - 2\eta(\mathbf{x}))]$  be the empirical estimate of  $\mathbb{E}_{\mathcal{D}_{\mathbf{x}}}[\phi(\mathbf{x})(1 - 2\eta(\mathbf{x}))]$  formed from  $\mathcal{O}(\log(1/\delta)/(\tau')^2)$  of  $\text{EX}^{\eta}(f, \mathcal{D}_{\mathbf{x}}, \eta)$ . If we increment the estimate by  $\tau'/2$  we can again guarantee that  $\mathbb{E}_{\mathcal{D}_{\mathbf{x}}}[\phi(\mathbf{x})(1 - 2\eta(\mathbf{x}))] < \widehat{\mathbb{E}}_{\mathcal{D}_{\mathbf{x}}}[\phi(\mathbf{x})(1 - 2\eta(\mathbf{x}))] < \mathbb{E}_{\mathcal{D}_{\mathbf{x}}}[\phi(\mathbf{x})(1 - 2\eta(\mathbf{x}))] + \tau'$ , with probability at least  $1 - \delta$ . Indeed, given that  $0 \leq \phi(\mathbf{x})(1 - 2\eta(\mathbf{x})) \leq 1, \forall \mathbf{x} \in \mathcal{X}$ , we can directly apply Hoeffding's inequality. As a result, with probability at least  $1 - 2\delta$  we have that

$$\frac{\widehat{\mathbb{E}}_{\mathcal{D}_{\mathbf{x}}}[\phi(\mathbf{x})(1 - 2\eta(\mathbf{x}))]}{\widehat{Z}} < \frac{\mathbb{E}_{\mathcal{D}_{\mathbf{x}}}[\phi(\mathbf{x})(1 - 2\eta(\mathbf{x}))] + \tau'}{Z} \leq \frac{\mathbb{E}_{\mathcal{D}'_{\mathbf{x}}}[\phi(\mathbf{x})] + \tau' C}{\mathbb{E}_{\mathcal{D}'_{\mathbf{x}}}[\phi(\mathbf{x})] + \frac{\tau}{2}}, \quad (29)$$

$$\frac{\widehat{\mathbb{E}}_{\mathcal{D}_{\mathbf{x}}}[\phi(\mathbf{x})(1 - 2\eta(\mathbf{x}))]}{\widehat{Z}} > \frac{\mathbb{E}_{\mathcal{D}_{\mathbf{x}}}[\phi(\mathbf{x})(1 - 2\eta(\mathbf{x}))]}{Z + \tau'} \geq \frac{1}{1 + \tau/2} \mathbb{E}_{\mathcal{D}'_{\mathbf{x}}}[\phi(\mathbf{x})], \quad (30)$$

where in the final bound we used that  $\tau' \leq \tau Z/2$ . Thus, it follows from (30) that

$$\frac{\widehat{\mathbb{E}}_{\mathcal{D}_{\mathbf{x}}}[\phi(\mathbf{x})(1 - 2\eta(\mathbf{x}))]}{\widehat{Z}} - \frac{\mathbb{E}_{\mathcal{D}'_{\mathbf{x}}}[\phi(\mathbf{x})]}{\mathbb{E}_{\mathcal{D}'_{\mathbf{x}}}[\phi(\mathbf{x})]} > \frac{\mathbb{E}_{\mathcal{D}'_{\mathbf{x}}}[\phi(\mathbf{x})]}{\mathbb{E}_{\mathcal{D}'_{\mathbf{x}}}[\phi(\mathbf{x})]} \left( \frac{1}{1 + \tau/2} - 1 \right) \geq -\frac{\mathbb{E}_{\mathcal{D}'_{\mathbf{x}}}[\phi(\mathbf{x})]}{\mathbb{E}_{\mathcal{D}'_{\mathbf{x}}}[\phi(\mathbf{x})]} \frac{\tau}{2} \geq -\frac{\tau}{2}, \quad (31)$$

since  $\tau > 0$  and  $0 \leq \mathbb{E}_{\mathcal{D}'_{\mathbf{x}}}[\phi(\mathbf{x})] \leq 1$ . As a result, if we combine (29) and (31) we obtain that

$$-\frac{\tau}{2} < \frac{\widehat{\mathbb{E}}_{\mathcal{D}_{\mathbf{x}}}[\phi(\mathbf{x})(1-2\eta(\mathbf{x}))]}{\widehat{Z}} - \mathbb{E}_{\mathcal{D}'_{\mathbf{x}}}[\phi(\mathbf{x})] < \frac{\tau}{2}, \quad (32)$$

with probability at least  $1 - 2\delta$ ; finally, rescaling  $\delta := \delta/2$  concludes the proof.  $\square$

### A.7 Proof of Lemma 5.4

*Proof.* Let  $Z = \mathcal{M}^{-1}$  and  $\psi(\mathbf{x}, f(\mathbf{x})) = \phi(\mathbf{x})f(\mathbf{x})$  the input query. Every correlational statistical query on distribution  $\mathcal{D}'_{\mathbf{x}}$  can be expressed as

$$\mathbb{E}_{\mathbf{x} \sim \mathcal{D}'_{\mathbf{x}}}[\phi(\mathbf{x})f(\mathbf{x})] = \frac{1}{Z} \int_{\mathcal{X}} \phi(\mathbf{x})f(\mathbf{x})(1-2\eta(\mathbf{x}))\mathcal{D}_{\mathbf{x}}(\mathbf{x})d\mathbf{x} = \frac{1}{Z} \mathbb{E}_{(\mathbf{x}, y) \sim \mathcal{D}}[\phi(\mathbf{x})y]. \quad (33)$$

Let  $\widehat{Z}$  be the empirical estimate of  $Z$  from  $\mathcal{O}(\log(1/\delta)/(\tau')^2)$  samples of  $\text{EX}^{\eta}(f, \mathcal{D}_{\mathbf{x}}, \eta)$ , for some  $\delta > 0$  and  $\tau' := \tau/(2C^2)$ . If we increment our estimate by  $\tau'/2$ , it follows that  $Z < \widehat{Z} < Z + \tau'$  with probability at least  $1 - \delta$ . Thus, we obtain that

$$\left| \frac{1}{\widehat{Z}} \mathbb{E}_{(\mathbf{x}, y) \sim \mathcal{D}}[\phi(\mathbf{x})y] - \frac{1}{Z} \mathbb{E}_{(\mathbf{x}, y) \sim \mathcal{D}}[\phi(\mathbf{x})y] \right| \leq \frac{\tau'}{Z^2} \leq \tau' C^2 = \frac{\tau}{2}. \quad (34)$$

Moreover, let  $\widehat{E}_{\mathcal{D}}[\phi(\mathbf{x})y]$  the empirical estimate of  $\mathbb{E}_{\mathcal{D}}[\phi(\mathbf{x})y]$ . For  $Z < \widehat{Z}$ , Hoeffding's inequality implies that  $\mathcal{O}(C^2 \log(1/\delta)/\tau^2)$  samples suffice so that

$$\left| \frac{1}{\widehat{Z}} \widehat{E}_{\mathcal{D}}[\phi(\mathbf{x})y] - \frac{1}{Z} \mathbb{E}_{(\mathbf{x}, y) \sim \mathcal{D}}[\phi(\mathbf{x})y] \right| < \frac{\tau}{2\widehat{Z}C} < \frac{\tau}{2ZC} < \frac{\tau}{2}, \quad (35)$$

with probability at least  $1 - \delta$ . Thus, combining (34) and (35) we obtain that with probability at least  $1 - 2\delta$ ,

$$\left| \frac{1}{\widehat{Z}} \widehat{E}_{\mathcal{D}}[\phi(\mathbf{x})y] - \mathbb{E}_{\mathcal{D}'_{\mathbf{x}}}[\phi(\mathbf{x})f(\mathbf{x})] \right| < \tau. \quad (36)$$

$\square$

## B Optimality in the Realizable Instance

In this section we analyze whether obtaining a hypothesis  $h$  such that  $\text{err}_{\mathcal{D}}(h) \leq \text{OPT} + \epsilon$  implies that  $\Pr_{\mathcal{D}_{\mathbf{x}}}[h(\mathbf{x}) \neq f(\mathbf{x})] \leq \epsilon'$ , for some  $\epsilon'$  that depends polynomially on  $\epsilon$ . To be more precise, we show that this is indeed the case in the Massart as well as the Tsybakov model, but as we will see it does not hold in general.

**Massart Model.** Consider a hypothesis  $h$  such that  $\text{err}_{\mathcal{D}}(h) \leq \text{OPT} + \epsilon$ , for any  $\epsilon > 0$ . Then, given that  $\eta(\mathbf{x}) \leq \gamma$ , it follows that

$$\text{err}_{\mathcal{D}}(h) = \text{OPT} + \mathbb{E}_{\mathbf{x} \sim \mathcal{D}_{\mathbf{x}}}[(1-2\eta(\mathbf{x}))\mathbf{1}\{h(\mathbf{x}) \neq f(\mathbf{x})\}] \quad (37)$$

$$\geq \text{OPT} + (1-2\gamma) \Pr_{\mathbf{x} \sim \mathcal{D}_{\mathbf{x}}}[f(\mathbf{x}) \neq h(\mathbf{x})]. \quad (38)$$

Thus, we obtain that

$$\Pr_{\mathbf{x} \sim \mathcal{D}_{\mathbf{x}}}[f(\mathbf{x}) \neq h(\mathbf{x})] \leq \frac{\epsilon}{1-2\gamma}. \quad (39)$$

As a result, it suffices to select  $\epsilon = \epsilon'(1-2\gamma)$  to guarantee  $\epsilon'$  excess error in the underlying realizable instance.

**Tsybakov Model.** Again, consider a hypothesis  $h$  such that  $\text{err}_{\mathcal{D}}(h) \leq \text{OPT} + \epsilon$ , for any  $\epsilon > 0$ , and fix some  $t \in [0, t_0]$ . Employing similar ideas to Lemma 3.2 yields that

$$\text{err}_{\mathcal{D}}(h) = \text{OPT} + \mathbb{E}_{\mathbf{x} \sim \mathcal{D}_{\mathbf{x}}} [(1 - 2\eta(\mathbf{x}))\mathbb{1}\{h(\mathbf{x}) \neq f(\mathbf{x})\}] \quad (40)$$

$$\geq \text{OPT} + \int_{\mathcal{X}_{good}} (1 - 2\eta(\mathbf{x}))\mathbb{1}\{h(\mathbf{x}) \neq f(\mathbf{x})\} \mathcal{D}_{\mathbf{x}}(\mathbf{x}) d\mathbf{x} \quad (41)$$

$$\geq \text{OPT} + 2t \int_{\mathcal{X}_{good}} \mathbb{1}\{h(\mathbf{x}) \neq f(\mathbf{x})\} \mathcal{D}_{\mathbf{x}}(\mathbf{x}) d\mathbf{x}, \quad (42)$$

where  $\mathcal{X}_{good}$  is defined as in Lemma 3.2. Moreover, given that  $\Pr_{\mathcal{D}_{\mathbf{x}}}[\mathbf{x} \in \mathcal{X}_{good}] \geq 1 - At^{\frac{\alpha}{1-\alpha}}$ , we obtain that

$$\Pr_{\mathbf{x} \sim \mathcal{D}_{\mathbf{x}}}[h(\mathbf{x}) \neq f(\mathbf{x})] \leq \frac{\epsilon}{2t} + At^{\frac{\alpha}{1-\alpha}}. \quad (43)$$

Therefore, in order to get  $\Pr_{\mathbf{x} \sim \mathcal{D}_{\mathbf{x}}}[h(\mathbf{x}) \neq f(\mathbf{x})] \leq \epsilon'$ , for any  $\epsilon' > 0$ , it suffices to select  $\epsilon$  such that

$$\epsilon = \sup_{t \in [0, t_0]} \left\{ 2t\epsilon' - 2At^{\frac{1}{1-\alpha}} \right\}. \quad (44)$$

In particular, it follows that

$$\sup_{t \in [0, t_0]} \left\{ 2t\epsilon' - 2At^{\frac{1}{1-\alpha}} \right\} = \begin{cases} 2(\epsilon')^{\frac{1}{\alpha}} \left(\frac{1-\alpha}{A}\right)^{\frac{1-\alpha}{\alpha}} - 2A \left(\epsilon' \frac{1-\alpha}{A}\right)^{\frac{1}{\alpha}} & \text{if } t^* \leq t_0, \\ 2t_0\epsilon' - 2At_0^{\frac{1}{1-\alpha}} & \text{if } t^* > t_0, \end{cases}$$

where

$$t^* = \left( \epsilon' \frac{1-\alpha}{A} \right)^{\frac{1-\alpha}{\alpha}}. \quad (45)$$

On the other hand, consider the following noise function:

**Definition B.1.** A noise function  $\eta(\mathbf{x})$  satisfies a  $\beta$ -clean condition if there exists a region  $\mathcal{X}_{clean} \subseteq \mathcal{X}$  such that

- $\Pr_{\mathbf{x} \sim \mathcal{D}_{\mathbf{x}}}[\mathbf{x} \in \mathcal{X}_{clean}] \geq \beta$ ;
- $\eta(\mathbf{x}) = 0, \forall \mathbf{x} \in \mathcal{X}_{clean}$ .

This noise condition allows a  $1 - \beta$  fraction of the probability mass to be corrupted with noise arbitrarily close to  $1/2$ .

**Lemma B.2.** The magnitude of a  $\beta$ -clean noise with respect to any distribution  $\mathcal{D}_{\mathbf{x}}$  is upper-bounded by  $1/\beta$ .

*Proof.* It follows that

$$\mathcal{M}^{-1} = \int_{\mathcal{X}} (1 - 2\eta(\mathbf{x})) \mathcal{D}_{\mathbf{x}}(\mathbf{x}) d\mathbf{x} \geq \int_{\mathcal{X}_{clean}} \mathcal{D}_{\mathbf{x}}(\mathbf{x}) d\mathbf{x} \geq \beta. \quad (46)$$

□

However, in this particular noise model a guarantee in the noisy distribution does not necessarily translate in the realizable instance. Indeed, assume that  $\mathcal{D}_{\mathbf{x}}$  is the uniform distribution on  $\mathbb{B}_2 = \{\mathbf{x} \in \mathbb{R}^2 : \|\mathbf{x}\|_2 \leq 1\}$ . We consider a partition of  $\mathbb{B}_2$  into  $\mathcal{X}_{clean}^r, \mathcal{X}_{clean}^\ell$ , and the region  $\mathbb{B}_2 \setminus (\mathcal{X}_{clean}^r \cup \mathcal{X}_{clean}^\ell)$ , as indicated in Figure 1, and

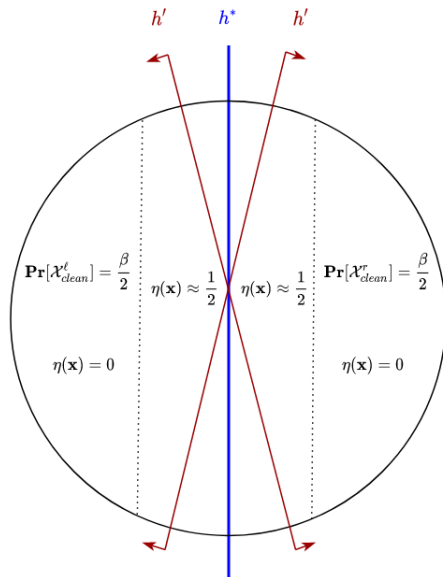

Figure 1: The geometry of our example; here  $h^*$  represents the optimal classifier.

we let  $\Pr_{\mathcal{D}_{\mathbf{x}}}[\mathbf{x} \in \mathcal{X}_{clean}^l] = \Pr_{\mathcal{D}_{\mathbf{x}}}[\mathbf{x} \in \mathcal{X}_{clean}^r] = \frac{\beta}{2}$ . In addition, we let  $\eta(\mathbf{x}) = 0, \forall \mathbf{x} \in \mathcal{X}_{clean}^r \cup \mathcal{X}_{clean}^l$ , while for the rest of the probability mass we let  $\eta(\mathbf{x}) = \frac{1}{2} - \rho$ , for some  $\rho > 0$ .

The problem that arises is that in the limit of  $\rho \rightarrow 0$ ,  $\text{err}_{\mathcal{D}}(h') \rightarrow \text{err}_{\mathcal{D}}(h^*) = \text{OPT}$ , for any  $h'$  as in Figure 1. Yet, it is clear that in the realizable instance the error of  $h'$  can be very far from the optimal. Nonetheless, it should be noted that a hypothesis  $h$  such that  $\text{err}_{\mathcal{D}}(h) \leq \text{OPT} + \epsilon$  would classify correctly the clean data even in the presence of intense noise, a result that appears to be non-trivial and of independent interest.
